# Supplementary material for: Syntheses, structures, and magnetic properties of five coordination polymers constructed from biphenyl-3,4′,5-tricarboxylic acid and (bis)imidazole linkers
Source: Royal Society of Chemistry journal article supplement (doi:10.1039/c3ce42565g), 2014-01-01
Supplement: c3ce42565g1.pdf [file c3ce42565g1.pdf]

*Electronic Supplementary Information (ESI) for*

**Syntheses, Structures, and Magnetic Properties of Five Biphenyl-3,4',5-  
Tricarboxylic Acid Based Coordination Polymers from 1D Chain to 3D  
Framework**

5      Xiutang Zhang,<sup>\*a,b</sup> Liming Fan,<sup>a,b</sup> Wei Zhang,<sup>a</sup> Weiliu Fan,<sup>b</sup> Liming Sun,<sup>b</sup> Xian Zhao<sup>\*b</sup>

<sup>a</sup> *Advanced Material Institute of Research, College of Chemistry and Chemical Engineering, Qilu Normal University, Jinan, 250013, China.* <sup>b</sup> *State Key Laboratory of Crystal Materials, Shandong University, Jinan 250100, China.*  
*E-mail: xiutangzhang@163.com; E-mail: zhaoxian@icm.sdu.edu.cn.*

**Table S1** Selected bond lengths (Å) and angles (°) for **1 – 5**.

|                                                                                                                                                      |            |                                              |            |                                               |            |                                               |            |
|------------------------------------------------------------------------------------------------------------------------------------------------------|------------|----------------------------------------------|------------|-----------------------------------------------|------------|-----------------------------------------------|------------|
| <b>Complex 1</b>                                                                                                                                     |            |                                              |            |                                               |            |                                               |            |
| Ni(1)-O(6) <sup>#1</sup>                                                                                                                             | 1.9968(18) | Ni(1)-N(5)                                   | 2.053(2)   | Ni(1)-N(7)                                    | 2.063(2)   | Ni(1)-O(7)                                    | 2.0917(16) |
| Ni(1)-O(3)                                                                                                                                           | 2.0990(17) | Ni(1)-O(4)                                   | 2.1957(17) | Ni(2)-N(3)                                    | 2.094(2)   | Ni(2)-N(1)                                    | 2.121(2)   |
| Ni(2)-O(1)                                                                                                                                           | 2.1611(16) | O(6) <sup>#1</sup> -Ni(1)-N(5)               | 92.91(9)   | O(6) <sup>#1</sup> -Ni(1)-N(7)                | 89.07(9)   | N(5)-Ni(1)-N(7)                               | 177.87(9)  |
| O(6) <sup>#1</sup> -Ni(1)-O(7)                                                                                                                       | 92.98(7)   | N(5)-Ni(1)-O(7)                              | 89.80(8)   | N(7)-Ni(1)-O(7)                               | 89.32(8)   | O(6) <sup>#1</sup> -Ni(1)-O(3)                | 163.39(7)  |
| N(5)-Ni(1)-O(3)                                                                                                                                      | 88.70(8)   | N(7)-Ni(1)-O(3)                              | 89.61(8)   | O(7)-Ni(1)-O(3)                               | 103.56(7)  | O(6) <sup>#1</sup> -Ni(1)-O(4)                | 102.22(7)  |
| N(5)-Ni(1)-O(4)                                                                                                                                      | 89.53(8)   | N(7)-Ni(1)-O(4)                              | 90.80(8)   | O(7)-Ni(1)-O(4)                               | 164.80(7)  | O(3)-Ni(1)-O(4)                               | 61.24(6)   |
| N(3) <sup>#2</sup> -Ni(2)-N(3)                                                                                                                       | 180.000(1) | N(3) <sup>#2</sup> -Ni(2)-N(1)               | 86.40(9)   | N(3)-Ni(2)-N(1)                               | 93.60(9)   | N(3) <sup>#2</sup> -Ni(2)-N(1) <sup>#2</sup>  | 93.60(9)   |
| N(3)-Ni(2)-N(1) <sup>#2</sup>                                                                                                                        | 86.40(9)   | N(1)-Ni(2)-N(1) <sup>#2</sup>                | 180.000(1) | N(3) <sup>#2</sup> -Ni(2)-O(1) <sup>#2</sup>  | 87.12(8)   | N(3)-Ni(2)-O(1) <sup>#2</sup>                 | 92.88(8)   |
| N(1)-Ni(2)-O(1) <sup>#2</sup>                                                                                                                        | 95.49(7)   | N(1) <sup>#2</sup> -Ni(2)-O(1) <sup>#2</sup> | 84.51(7)   | N(3) <sup>#2</sup> -Ni(2)-O(1)                | 92.88(8)   | N(3)-Ni(2)-O(1)                               | 87.12(8)   |
| N(1)-Ni(2)-O(1)                                                                                                                                      | 84.51(7)   | N(1) <sup>#2</sup> -Ni(2)-O(1)               | 95.49(7)   | O(1) <sup>#2</sup> -Ni(2)-O(1)                | 180.00(10) |                                               |            |
| Symmetry codes: #1 x, y, z-1; #2 -x+2, -y+1, -z+1.                                                                                                   |            |                                              |            |                                               |            |                                               |            |
| <b>Complex 2</b>                                                                                                                                     |            |                                              |            |                                               |            |                                               |            |
| Co(1)-O(1)                                                                                                                                           | 2.071(3)   | Co(1)-O(7)                                   | 2.071(3)   | Co(1)-O(4) <sup>#1</sup>                      | 2.076(3)   | Co(1)-N(4) <sup>#2</sup>                      | 2.111(4)   |
| Co(1)-O(7) <sup>#3</sup>                                                                                                                             | 2.118(3)   | Co(1)-O(5) <sup>#4</sup>                     | 2.142(3)   | Co(2)-O(7)                                    | 1.968(3)   | Co(2)-O(6) <sup>#5</sup>                      | 1.992(3)   |
| Co(2)-O(2)                                                                                                                                           | 2.002(3)   | Co(2)-N(1)                                   | 2.057(4)   | Co(2)-O(4) <sup>#6</sup>                      | 2.253(3)   | O(7)-Co(1)-O(1)                               | 96.23(11)  |
| O(1)-Co(1)-O(4) <sup>#1</sup>                                                                                                                        | 172.09(11) | O(7)-Co(1)-O(4) <sup>#1</sup>                | 90.37(11)  | O(1)-Co(1)-N(4) <sup>#2</sup>                 | 88.24(13)  | O(7)-Co(1)-N(4) <sup>#2</sup>                 | 98.37(13)  |
| O(4) <sup>#1</sup> -Co(1)-N(4) <sup>#2</sup>                                                                                                         | 95.13(13)  | O(1)-Co(1)-O(7) <sup>#3</sup>                | 95.54(11)  | O(7)-Co(1)-O(7) <sup>#3</sup>                 | 82.60(12)  | O(4) <sup>#1</sup> -Co(1)-O(7) <sup>#3</sup>  | 80.95(10)  |
| N(4) <sup>#2</sup> -Co(1)-O(7) <sup>#3</sup>                                                                                                         | 175.98(13) | O(1)-Co(1)-O(5) <sup>#4</sup>                | 85.61(11)  | O(7)-Co(1)-O(5) <sup>#4</sup>                 | 173.36(11) | O(4) <sup>#1</sup> -Co(1)-O(5) <sup>#4</sup>  | 87.35(11)  |
| N(4) <sup>#2</sup> -Co(1)-O(5) <sup>#4</sup>                                                                                                         | 88.05(13)  | O(7) <sup>#3</sup> -Co(1)-O(5) <sup>#4</sup> | 90.88(11)  | O(7)-Co(2)-O(6) <sup>#5</sup>                 | 106.12(12) | O(7)-Co(2)-O(2)                               | 113.68(12) |
| O(6) <sup>#5</sup> -Co(2)-O(2)                                                                                                                       | 137.73(13) | O(7)-Co(2)-N(1)                              | 103.62(14) | O(6) <sup>#5</sup> -Co(2)-N(1)                | 93.59(14)  | O(2)-Co(2)-N(1)                               | 90.51(14)  |
| O(7)-Co(2)-O(4) <sup>#6</sup>                                                                                                                        | 80.02(11)  | O(6) <sup>#5</sup> -Co(2)-O(4) <sup>#6</sup> | 83.97(11)  | O(2)-Co(2)-O(4) <sup>#6</sup>                 | 89.26(11)  | N(1)-Co(2)-O(4) <sup>#6</sup>                 | 176.10(13) |
| Symmetry codes: #1 x, y+1, z; #2 -x+3/2, y+1/2, -z+1/2; #3 -x+2, -y+2, -z+1; #4 -x+5/2, y+1/2, -z+1/2; #5 x-1/2, -y+3/2, z+1/2; #6 -x+2, -y+1, -z+1. |            |                                              |            |                                               |            |                                               |            |
| <b>Complex 3</b>                                                                                                                                     |            |                                              |            |                                               |            |                                               |            |
| N(1)-Zn(1)                                                                                                                                           | 2.046(3)   | O(1)-Zn(1)                                   | 1.963(3)   | Zn(1)-O(5) <sup>#3</sup>                      | 1.964(2)   | Zn(1)-N(4) <sup>#1</sup>                      | 2.048(3)   |
| O(1)-Zn(1)-O(5) <sup>#3</sup>                                                                                                                        | 100.89(11) | O(1)-Zn(1)-N(1)                              | 116.45(12) | O(5) <sup>#3</sup> -Zn(1)-N(1)                | 110.61(12) | O(1)-Zn(1)-N(4) <sup>#1</sup>                 | 112.49(12) |
| O(5) <sup>#3</sup> -Zn(1)-N(4) <sup>#1</sup>                                                                                                         | 123.15(12) | N(1)-Zn(1)-N(4) <sup>#1</sup>                | 94.28(12)  |                                               |            |                                               |            |
| Symmetry codes: #1 -x, -y+2, -z+2; #3 x-1, y-1, z.                                                                                                   |            |                                              |            |                                               |            |                                               |            |
| <b>Complex 4</b>                                                                                                                                     |            |                                              |            |                                               |            |                                               |            |
| Co(1)-O(9) <sup>#1</sup>                                                                                                                             | 1.990(2)   | Co(1)-O(1)                                   | 2.021(2)   | Co(1)-O(8)                                    | 2.018(2)   | Co(1)-N(4) <sup>#2</sup>                      | 2.100(3)   |
| Co(1)-N(1)                                                                                                                                           | 2.123(3)   | Co(2)-O(7)                                   | 2.045(2)   | Co(2)-O(10) <sup>#1</sup>                     | 2.047(2)   | Co(2)-N(8) <sup>#3</sup>                      | 2.072(3)   |
| Co(2)-N(5)                                                                                                                                           | 2.087(3)   | Co(2)-O(2) <sup>#4</sup>                     | 2.104(2)   | O(9) <sup>#1</sup> -Co(1)-O(1)                | 120.45(11) | N(4) <sup>#2</sup> -Co(1)-N(1)                | 174.19(15) |
| O(9) <sup>#1</sup> -Co(1)-O(8)                                                                                                                       | 119.09(11) | O(1)-Co(1)-O(8)                              | 120.04(10) | O(1)-Co(1)-N(4) <sup>#2</sup>                 | 86.76(12)  | O(9) <sup>#1</sup> -Co(1)-N(4) <sup>#2</sup>  | 93.78(11)  |
| O(8)-Co(1)-N(4) <sup>#2</sup>                                                                                                                        | 95.91(13)  | O(9) <sup>#1</sup> -Co(1)-N(1)               | 84.83(10)  | O(1)-Co(1)-N(1)                               | 89.08(12)  | O(8)-Co(1)-N(1)                               | 89.68(12)  |
| O(7)-Co(2)-O(2) <sup>#4</sup>                                                                                                                        | 151.57(10) | O(7)-Co(2)-O(10) <sup>#1</sup>               | 119.00(11) | O(7)-Co(2)-N(8) <sup>#3</sup>                 | 91.83(11)  | O(10) <sup>#1</sup> -Co(2)-N(8) <sup>#3</sup> | 102.11(12) |
| O(7)-Co(2)-N(5)                                                                                                                                      | 85.82(10)  | O(10) <sup>#1</sup> -Co(2)-N(5)              | 89.75(12)  | N(8) <sup>#3</sup> -Co(2)-N(5)                | 167.47(14) | O(10) <sup>#1</sup> -Co(2)-O(2) <sup>#4</sup> | 87.76(9)   |
| N(8) <sup>#3</sup> -Co(2)-O(2) <sup>#4</sup>                                                                                                         | 91.55(11)  | N(5)-Co(2)-O(2) <sup>#4</sup>                | 84.81(11)  |                                               |            |                                               |            |
| Symmetry codes: #1 -x+2, y-1/2, -z+2; #2 x+1, y, z+1; #3 x-1, y, z-1; #4 -x+2, y+1/2, -z+2.                                                          |            |                                              |            |                                               |            |                                               |            |
| <b>Complex 5</b>                                                                                                                                     |            |                                              |            |                                               |            |                                               |            |
| Mn(1)-O(4) <sup>#1</sup>                                                                                                                             | 2.1251(18) | Mn(1)-O(10)                                  | 2.2490(19) | Mn(1)-N(9)                                    | 2.258(3)   | Mn(2)-O(2)                                    | 2.120(2)   |
| Mn(2)-O(9)                                                                                                                                           | 2.1977(18) | Mn(2)-O(5) <sup>#4</sup>                     | 2.2079(18) | Mn(2)-O(1W)                                   | 2.223(2)   | Mn(2)-N(4) <sup>#5</sup>                      | 2.232(3)   |
| Mn(2)-N(1)                                                                                                                                           | 2.304(2)   | Mn(3)-O(3) <sup>#1</sup>                     | 2.135(2)   | Mn(3)-O(1)                                    | 2.1661(18) | Mn(3)-N(5)                                    | 2.220(3)   |
| Mn(3)-O(9)                                                                                                                                           | 2.2236(19) | Mn(3)-N(8) <sup>#5</sup>                     | 2.240(3)   | Mn(3)-O(10)                                   | 2.3326(19) | O(4) <sup>#1</sup> -Mn(1)-O(4) <sup>#2</sup>  | 180.000(1) |
| O(4) <sup>#1</sup> -Mn(1)-O(10)                                                                                                                      | 90.17(7)   | O(4) <sup>#2</sup> -Mn(1)-O(10)              | 89.83(7)   | O(4) <sup>#1</sup> -Mn(1)-O(10) <sup>#3</sup> | 89.83(7)   | O(4) <sup>#2</sup> -Mn(1)-O(10) <sup>#3</sup> | 90.17(7)   |
| O(10) <sup>#3</sup> -Mn(1)-O(10)                                                                                                                     | 180.000(1) | O(4) <sup>#1</sup> -Mn(1)-N(9) <sup>#3</sup> | 93.82(9)   | O(4) <sup>#2</sup> -Mn(1)-N(9) <sup>#3</sup>  | 86.18(9)   | O(10) <sup>#3</sup> -Mn(1)-N(9) <sup>#3</sup> | 91.95(9)   |
| O(10)-Mn(1)-N(9) <sup>#3</sup>                                                                                                                       | 88.05(9)   | O(4) <sup>#1</sup> -Mn(1)-N(9)               | 86.18(9)   | O(4) <sup>#2</sup> -Mn(1)-N(9)                | 93.82(9)   | O(10) <sup>#3</sup> -Mn(1)-N(9)               | 88.05(9)   |
| O(10)-Mn(1)-N(9)                                                                                                                                     | 91.95(9)   | N(9) <sup>#3</sup> -Mn(1)-N(9)               | 180.000(1) | O(2)-Mn(2)-O(9)                               | 96.70(8)   | O(2)-Mn(2)-O(5) <sup>#4</sup>                 | 92.35(7)   |
| O(9)-Mn(2)-O(5) <sup>#4</sup>                                                                                                                        | 170.18(7)  | O(2)-Mn(2)-O(1W)                             | 176.46(7)  | O(9)-Mn(2)-O(1W)                              | 86.42(8)   | O(5) <sup>#4</sup> -Mn(2)-O(1W)               | 84.43(8)   |
| O(2)-Mn(2)-N(4) <sup>#5</sup>                                                                                                                        | 96.32(10)  | O(9)-Mn(2)-N(4) <sup>#5</sup>                | 88.32(9)   | O(5) <sup>#4</sup> -Mn(2)-N(4) <sup>#5</sup>  | 94.48(8)   | O(1W)-Mn(2)-N(4) <sup>#5</sup>                | 85.42(10)  |
| O(2)-Mn(2)-N(1)                                                                                                                                      | 85.71(8)   | O(9)-Mn(2)-N(1)                              | 92.30(8)   | O(5) <sup>#4</sup> -Mn(2)-N(1)                | 84.57(7)   | O(1W)-Mn(2)-N(1)                              | 92.51(9)   |
| N(4) <sup>#5</sup> -Mn(2)-N(1)                                                                                                                       | 177.80(9)  | O(3) <sup>#1</sup> -Mn(3)-O(1)               | 122.12(8)  | O(3) <sup>#1</sup> -Mn(3)-N(5)                | 81.87(9)   | O(1)-Mn(3)-N(5)                               | 85.27(9)   |
| O(3) <sup>#1</sup> -Mn(3)-O(9)                                                                                                                       | 148.26(7)  | O(1)-Mn(3)-O(9)                              | 89.26(7)   | N(5)-Mn(3)-O(9)                               | 97.51(8)   | O(3) <sup>#1</sup> -Mn(3)-N(8) <sup>#5</sup>  | 83.53(10)  |
| O(1)-Mn(3)-N(8) <sup>#5</sup>                                                                                                                        | 81.91(9)   | N(5)-Mn(3)-N(8) <sup>#5</sup>                | 151.42(11) | O(9)-Mn(3)-N(8) <sup>#5</sup>                 | 107.71(11) | O(3) <sup>#1</sup> -Mn(3)-O(10)               | 87.81(8)   |
| O(1)-Mn(3)-O(10)                                                                                                                                     | 149.71(8)  | N(5)-Mn(3)-O(10)                             | 105.34(9)  | O(9)-Mn(3)-O(10)                              | 61.57(7)   | N(8) <sup>#5</sup> -Mn(3)-O(10)               | 98.49(9)   |
| Symmetry codes: #1 -x+1, -y+2, -z+1; #2 x, y-1, z; #3 -x+1, -y+1, -z+1; #4 -x, -y+2, -z+2; #5 x, y, z-1.                                             |            |                                              |            |                                               |            |                                               |            |

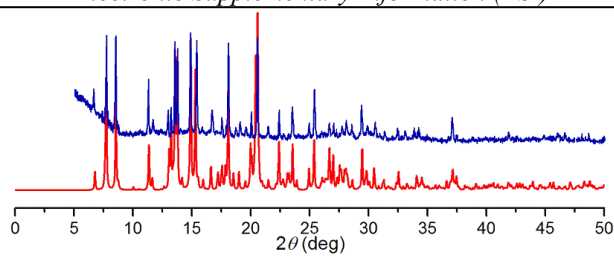

(a)

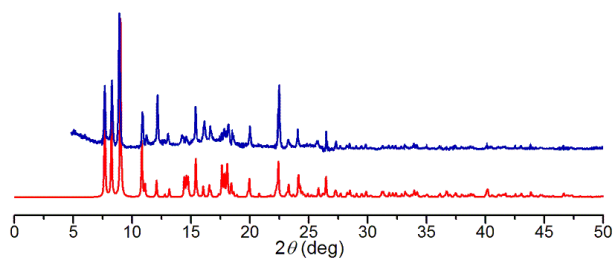

(b)

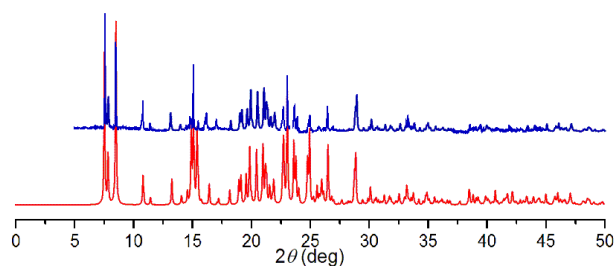

(c)

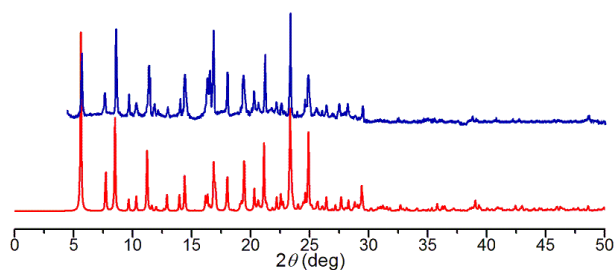

(d)

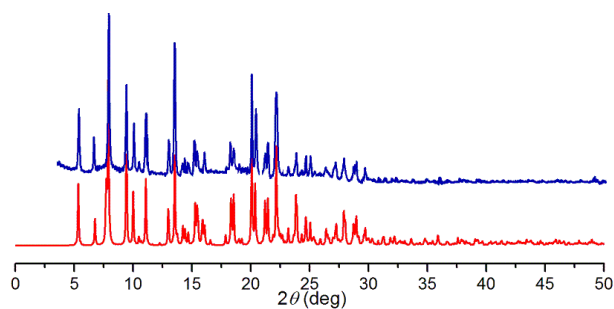

(e)

**Figure S1.** PXRD patterns of (a) **1**, (b) **2**, (c) **3**, (d) **4**, (e) **5**. Red: calculated from the X-ray single-crystal data; Dark blue: observed for the as-synthesized solids.

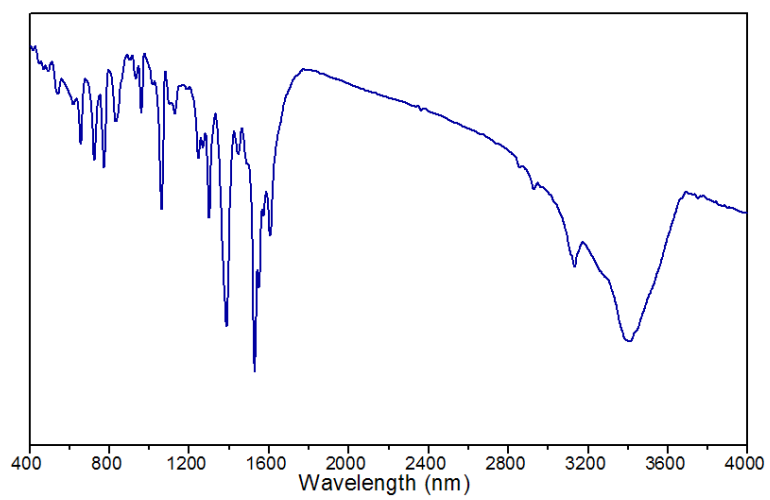

(a)

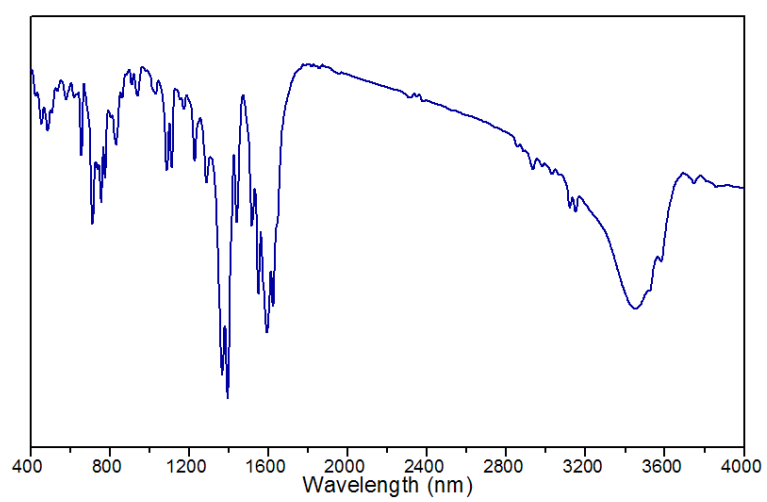

(b)

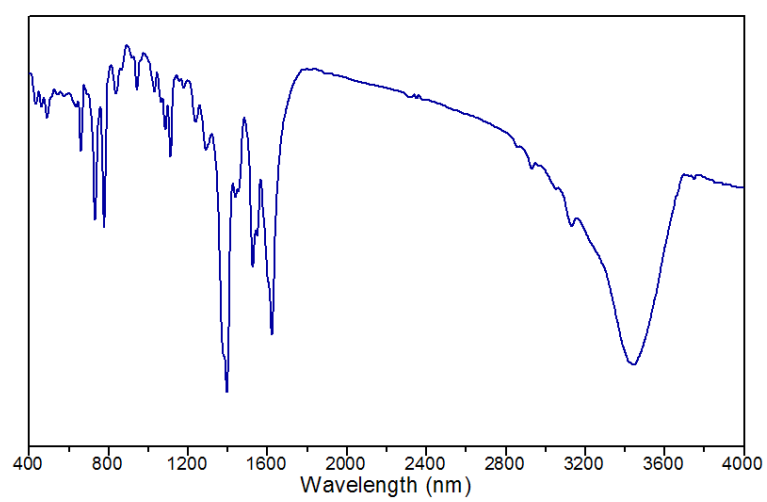

(c)

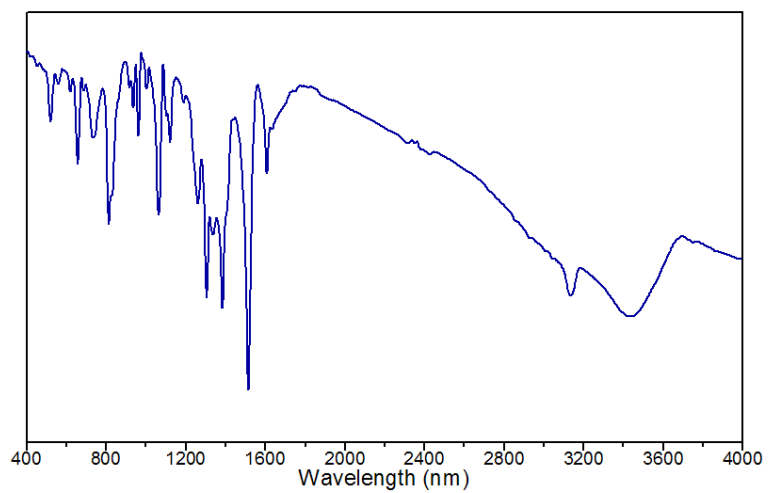

(d)

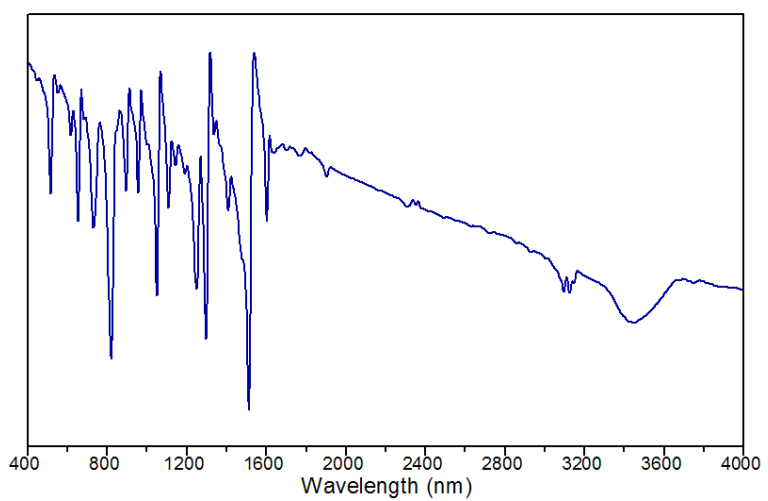

(e)

**Figure S2.** The IR spectras of (a) **1**, (b) **2**, (c) **3**, (d) **4**, (e) **5**.

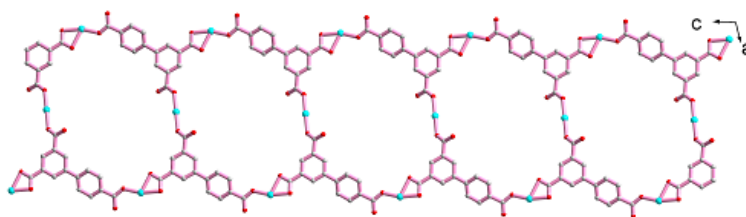

Figure S3. The 1D  $[\text{Ni}_3(\text{BPT})_2]_n$  ladder chain in compound 1 view along  $ac$  plane.

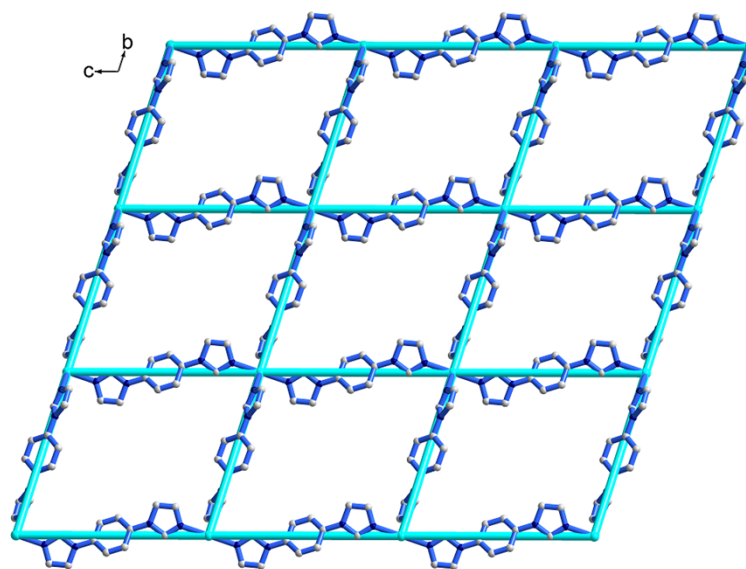

Figure S4. The 2D  $[\text{Ni}(\text{1,4-bib})_2]_n$  layer in compound 1 view along  $bc$  plane.

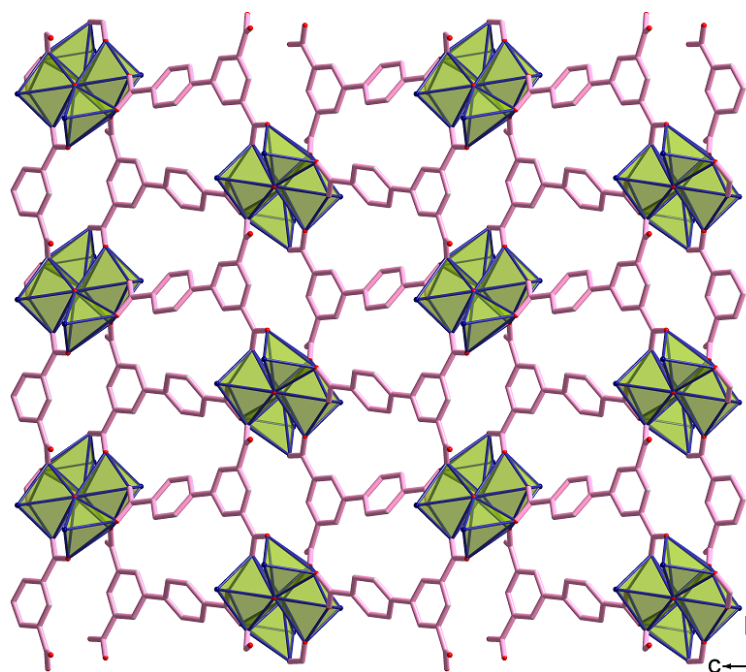

Figure S5. The 2D  $[\text{Co}_2(\mu_3\text{-OH})(\text{BPT})_3]_n$  bilayer in compound 2 view along  $bc$  plane.

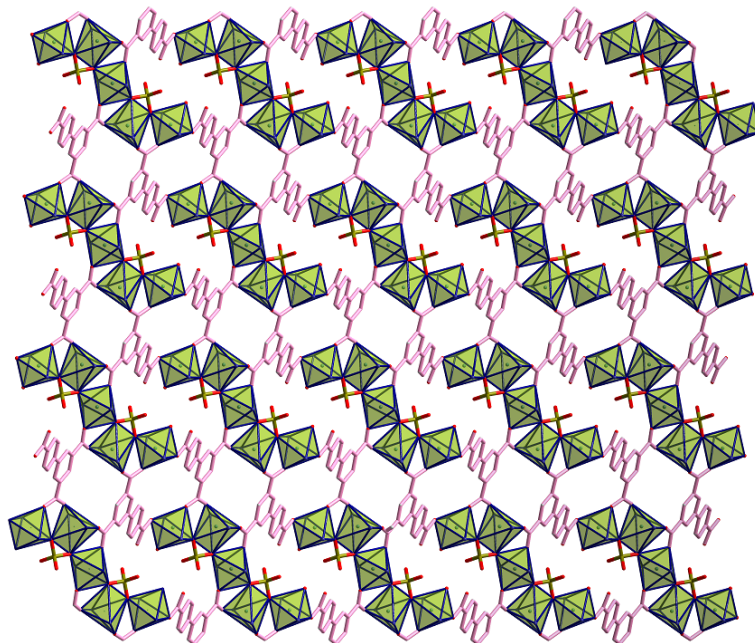

**Figure S6.** The 2D  $[\text{Mn}_3(\text{SO}_4)_2(\text{BPT})_2]_n$  networks in compound **5**.

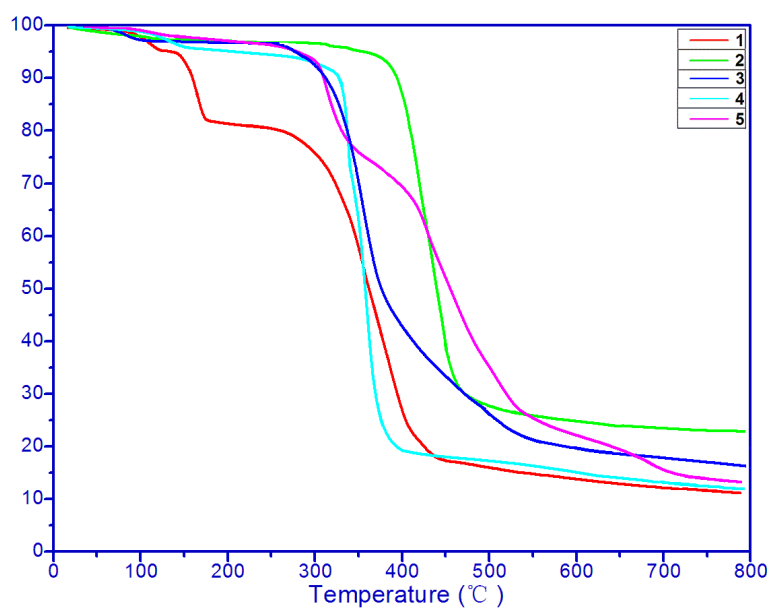

**Figure S7.** TGA curves for compounds **1–5**.
